# Supplementary material
Source: publisher figshare collection journal article supplement (https://acs.figshare.com/ndownloader/files/3749389)
Supplement: Supplementary file 1 [file 3749389]

## SUPPORTING INFORMATION

# Profiling private water systems to identify patterns of waterborne lead exposure

*Kelsey J. Pieper, \*<sup>†</sup> Leigh-Anne Krometis,<sup>†</sup> Daniel Gallagher,<sup>‡</sup> Brian Benham,<sup>†</sup> Marc Edwards<sup>‡</sup>*

<sup>†</sup>Virginia Tech, Biological Systems Engineering, 200 Seitz Hall, Blacksburg, VA 24061

<sup>‡</sup>Virginia Tech, Civil and Environmental Engineering, 418 Durham Hall, Blacksburg, VA 24061

\*Corresponding author; Telephone: 1-518-928-0177; Email: [kpieper@vt.edu](mailto:kpieper@vt.edu)

## DESCRIPTION OF SUPPORTING INFORMATION

5 Pages

Figure S1. LSI values and pH measurements plotted against 1 L first draw lead concentrations

Table S1. Plumbing characteristics documented during site inspection.

Table S2. Lead measurements collected at the 15 households in follow-up study

Previous extension efforts have recorded the Langelier Saturation Index (LSI) to communicate water corrosivity as this index is a measure of the water's potential to form calcium carbonate scale.<sup>1</sup> In this study, alkalinity and pH measurements were used in section 4.2. The Virginia Cooperative Extension no longer reports LSI values to homeowners, but rather discusses pH as a potential indicator of aggressive water and corrosion concerns. Figure S1 shows 1 L first draw lead concentrations collected at the kitchen cold-water tap compared to LSI values and pH measurements.

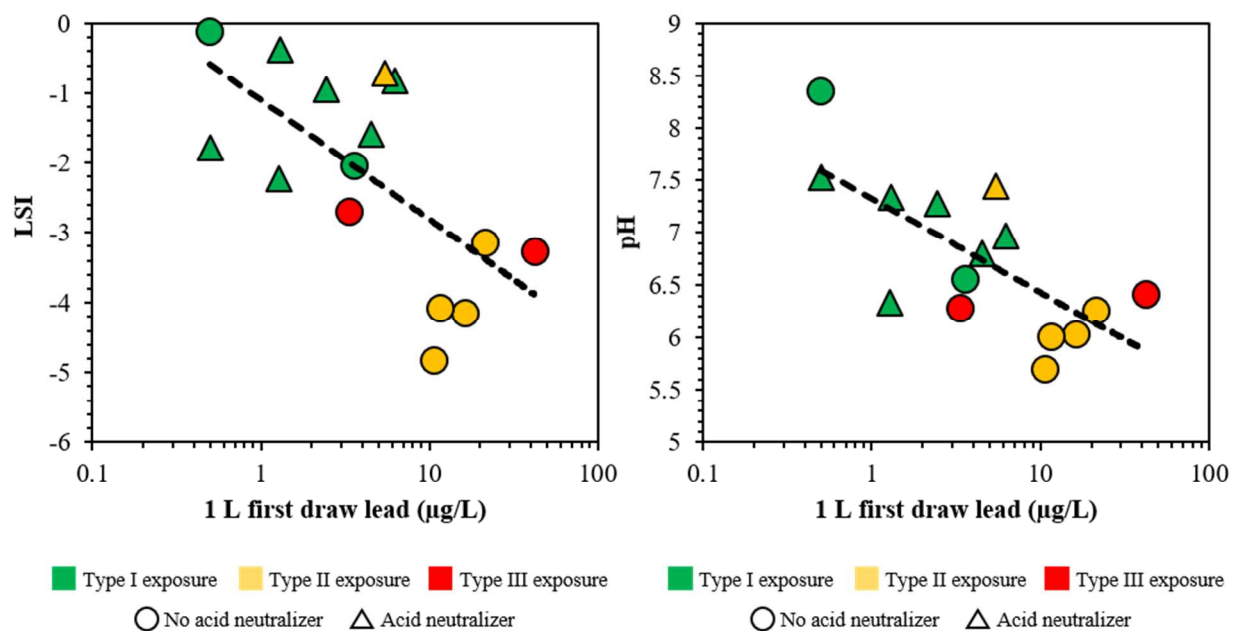

Figure S1. (a) LSI values plotted against 1 L first draw lead concentrations and (b) pH measurements plotted against 1 L first draw lead concentrations. The colors correspond to the different types of exposure observed, and different shapes correspond to the presence/absence of an acid neutralizer within the home.

Table S1. Characteristics of the plumbing network were documented during site inspection. Plumbing at the kitchen and bathroom sinks ('outlets') and pressure tank was inspected. The ditch pipe refers to the horizontal pipe connecting the premise plumbing and the well plumbing.

| Site ID | Flow rate at kitchen faucet (L/min) | Premise plumbing material observed at outlets and pressure tank | Fitting material observed at outlets and pressure tank | Ditch pipe material observed at pressure tank |
|---------|-------------------------------------|-----------------------------------------------------------------|--------------------------------------------------------|-----------------------------------------------|
| P-1     | 4.4                                 | Plastic                                                         | Brass                                                  | Plastic                                       |
| P-2     | 5.8                                 | Plastic                                                         | Brass & Plastic                                        | Black plastic                                 |
| P-3     | 4.2                                 | Copper & Plastic                                                | Brass & Plastic                                        | Plastic                                       |
| P-4     | 5.2                                 | Plastic                                                         | Brass & Plastic                                        | Black plastic                                 |
| P-5     | 3.4                                 | Copper & Plastic                                                | Brass                                                  | Plastic                                       |
| P-6     | 3.5                                 | Plastic                                                         | Brass                                                  | Black plastic                                 |
| P-7     | 4.2                                 | Copper & Plastic                                                | Brass                                                  | Copper                                        |
| P-8     | 9.5                                 | Plastic                                                         | Brass & Plastic                                        | Black plastic                                 |
| P-9     | 3.9                                 | Copper & Plastic                                                | Brass & Plastic                                        | Black plastic                                 |
| P-10    | 4.9                                 | Copper & Plastic                                                | Brass                                                  | Black plastic                                 |
| P-11    | 5.0                                 | Plastic                                                         | Brass                                                  | Black plastic                                 |
| P-12    | 5.7                                 | Plastic                                                         | Brass                                                  | Black plastic                                 |
| P-13    | 4.6                                 | Plastic                                                         | Brass                                                  | Black plastic                                 |
| P-14    | 4.2                                 | Copper                                                          | Brass & Plastic                                        | Black plastic                                 |
| P-15    | 3.8                                 | Plastic                                                         | Brass                                                  | Black plastic                                 |

Table S2. Lead data for 15 households in follow-up study. The patterns of waterborne lead exposure (Type I-III) correspond to the patterns discussed in the lead profiling effort in section 4.4. Further information regarding collection of samples C1-B2 can be found in section 3.2 and Figure 1. Lead measurements below the detection limit of 1 µg/L were recorded as “BDL”. If the volume of water stored in the plumbing between the kitchen sink and pressure tank was less than 3 L, no sample was collected and is recorded as “NS”.

| Site ID | Exposure Pattern | C1   | C2   | C3   | C4  | PT1  | PT2 | F1  | F2  | F3  | F4   | F5  | H1    | H2    | B1    | B2    |
|---------|------------------|------|------|------|-----|------|-----|-----|-----|-----|------|-----|-------|-------|-------|-------|
| P-1     | Type I           | 3.7  | BDL  | NS   | NS  | BDL  | BDL | BDL | BDL | BDL | BDL  | BDL | 2.4   | BDL   | 3.8   | BDL   |
| P-2     |                  | 3.6  | BDL  | BDL  | 1.2 | BDL  | BDL | BDL | BDL | BDL | BDL  | BDL | 1.1   | BDL   | 21.6  | 1.5   |
| P-4     |                  | 12.6 | 4.1  | 1.8  | NS  | 3.1  | 2.4 | 1.3 | BDL | BDL | BDL  | BDL | 4.5   | 7.3   | 11.8  | 2.3   |
| P-5     |                  | BDL  | BDL  | BDL  | NS  | BDL  | 2.0 | BDL | BDL | BDL | BDL  | BDL | BDL   | BDL   | BDL   | BDL   |
| P-9     |                  | 5.2  | 4.3  | 1.7  | NS  | BDL  | BDL | BDL | BDL | BDL | 1.3  | BDL | 2.7   | BDL   | 3.9   | 1.1   |
| P-10    |                  | 2.5  | 2.4  | NS   | NS  | 4.1  | BDL | BDL | BDL | BDL | BDL  | BDL | 2.5   | 3.6   | 4.1   | 1.8   |
| P-11    |                  | 1.1  | BDL  | BDL  | NS  | BDL  | BDL | BDL | BDL | BDL | BDL  | BDL | BDL   | BDL   | 3.1   | 1.3   |
| P-15    |                  | 2.3  | 4.0  | 2.9  | NS  | 2.5  | BDL | 1.3 | BDL | BDL | BDL  | BDL | 1.8   | 2.7   | BDL   | BDL   |
| P-3     | Type II          | 4.4  | 3.0  | NS   | NS  | BDL  | BDL | BDL | 3.3 | 2.9 | 43.1 | 1.4 | 7.2   | 8.6   | 19.7  | 2.7   |
| P-8     |                  | 3.7  | 54.9 | 67.0 | NS  | 3.5  | 7.5 | BDL | BDL | BDL | BDL  | BDL | 410.7 | 122.6 | 23.5  | 132.5 |
| P-6     | Type III         | 4.2  | 5.9  | NS   | NS  | 4.2  | 2.1 | 2.2 | 2.1 | 2.1 | 1.8  | 1.7 | 6.6   | 4.0   | 13.4  | 11.5  |
| P-7     |                  | 8.0  | 11.4 | 11.0 | NS  | 5.1  | 4.9 | 4.3 | 3.4 | 3.2 | 2.9  | 2.5 | 2.3   | BDL   | 17.5  | 2.8   |
| P-12    |                  | 26.0 | 19.6 | NS   | NS  | 11.3 | 6.3 | 3.4 | 3.5 | 3.3 | 2.9  | 2.4 | 10.0  | 5.5   | 21.0  | 4.3   |
| P-13    |                  | 23.4 | 13.9 | NS   | NS  | 11.4 | 7.0 | 4.8 | 2.2 | 2.0 | 2.8  | 2.7 | 15.7  | 15.9  | 131.3 | 17.7  |
| P-14    |                  | 12.9 | 11.1 | NS   | NS  | 8.8  | 7.4 | 6.1 | 4.3 | 3.9 | 3.8  | 4.6 | 11.0  | 9.4   | 18.0  | 6.5   |

## REFERENCES

1. Snoeyink, V. L.; Wagner, I., Principles of corrosion of water distribution systems. In *Internal Corrosion of Water Distribution Systems*, Second ed.; American Water Works Association Research Foundation: Denver, CO, 1996.
